# Supplementary material for: Translating the A1C Assay Into Estimated Average Glucose Values
Source: Oxford University Press journal article supplement (doi:10.2337/dc08-0545), 2008-06-08
Supplement: dc080545-sup-diabetescare.doc [file dc080545-sup-diabetescare.doc]

**Online Appendix 1.**

## Bayesian method for heteroschedastic error in the AG-HbA1c model

We assume the mean AG to be a simple linear function of HbA1c :

We assume the variance of AG depends on the HbA1c level

.

We used the Bayesian method for statistical inference. We attach flat priors to the parameters and use WinBUGS software to fit this model. A posterior p-value < 0.05 suggests that , rejecting the hypothesis that the AG has a constant variance.

**Online Appendix 2**

Bland-Altman type of analysis of the difference between the actual minus estimated glucose value (y-axis) plotted against the average glucose level, derived from the regression equation, on the x-axis.
